# Supplementary material for: Identification of Potential Antimalarial Drug Candidates Targeting Falcipain-2 Protein of Malaria Parasite—A Computational Strategy
Source: MDPI journal article supplement (doi:10.3390/biotech11040054), 2022-11-30
Supplement: s1 [file s1]

# SUPPLEMENTARY: Identification of Potential Antimalarial Drug Candidates Targeting Falcipain-2 Protein of Malaria Parasite – A Computational Strategy

Shrikant Nema, Kanika Verma, Ashutosh Mani, Neha Shree Maurya, Archana Tiwari and Praveen Kumar Bharti

**Table S1:** Pharmacokinetic parameters for oral bioavailability evaluation of different lead molecules

| S. No | Compounds Name            | miLogP | MW     | nON | nOHNH | nviolations |
|-------|---------------------------|--------|--------|-----|-------|-------------|
| Ref.  | Artemisinin               | 3.32   | 282.34 | 5   | 0     | 0           |
| 1     | Nicotine                  | 1.09   | 162.24 | 2   | 0     | 0           |
| 2     | Caffeine                  | 0.06   | 194.19 | 6   | 0     | 0           |
| 3     | Reserpine                 | 5.01   | 608.69 | 11  | 1     | 3           |
| 4     | Trospium                  | -0.61  | 392.52 | 4   | 1     | 0           |
| 5     | Benzatropine              | 4.27   | 307.44 | 2   | 0     | 0           |
| 6     | Methysergide              | 1.97   | 353.47 | 5   | 2     | 0           |
| 7     | Cabergoline               | 3.44   | 451.62 | 7   | 2     | 0           |
| 8     | Theophylline              | -0.01  | 180.17 | 6   | 1     | 0           |
| 9     | Morphine                  | 1.1    | 285.34 | 4   | 2     | 0           |
| 10    | Vindesine                 | 3.73   | 753.94 | 12  | 6     | 3           |
| 11    | Codeine                   | 1.41   | 299.37 | 4   | 1     | 0           |
| 12    | Dihydroergotamine         | 2.09   | 583.69 | 10  | 3     | 1           |
| 13    | Hydromorphone             | 1.42   | 285.34 | 4   | 1     | 0           |
| 14    | Ipratropium               | -1.47  | 332.46 | 4   | 1     | 0           |
| 15    | Methylergometrine         | 1.9    | 339.44 | 4   | 3     | 0           |
| 16    | Vinorelbine               | 5.92   | 778.95 | 12  | 2     | 3           |
| 17    | Metocurine iodide         | -1.41  | 652.83 | 8   | 0     | 1           |
| 18    | Miglustat                 | -0.72  | 219.28 | 5   | 4     | 0           |
| 19    | Hyoscyamine               | 1.77   | 289.38 | 4   | 1     | 0           |
| 20    | Quinine                   | 3.06   | 324.42 | 4   | 1     | 0           |
| 21    | Miglitol                  | -2.79  | 207.23 | 5   | 6     | 0           |
| 22    | Oxycodone                 | 0.79   | 315.37 | 5   | 1     | 0           |
| 23    | Levallorphan              | 4.04   | 283.42 | 2   | 1     | 0           |
| 24    | Dextromethorphan          | 3.94   | 271.4  | 2   | 0     | 0           |
| 25    | Anisotropinemethylbromide | 0.24   | 282.45 | 3   | 0     | 0           |
| 26    | Vincristine               | 4.95   | 824.97 | 14  | 3     | 2           |
| 27    | Cisatracurium             | -1.59  | 929.16 | 14  | 0     | 2           |

|    |                                 |              |               |          |          |          |
|----|---------------------------------|--------------|---------------|----------|----------|----------|
| 28 | Vinblastine                     | 5.56         | 810.99        | 13       | 3        | 3        |
| 29 | <b>Atropine</b>                 | <b>1.77</b>  | <b>289.38</b> | <b>4</b> | <b>1</b> | <b>0</b> |
| 30 | <b>Lisuride</b>                 | <b>3.16</b>  | <b>338.45</b> | <b>5</b> | <b>2</b> | <b>0</b> |
| 31 | <b>Butorphanol</b>              | <b>3.5</b>   | <b>327.47</b> | <b>3</b> | <b>2</b> | <b>0</b> |
| 32 | <b>Dyphylline</b>               | <b>-1.21</b> | <b>254.25</b> | <b>8</b> | <b>2</b> | <b>0</b> |
| 33 | <b>Pentazocine</b>              | <b>4.59</b>  | <b>285.43</b> | <b>2</b> | <b>1</b> | <b>0</b> |
| 34 | <b>Galantamine</b>              | <b>1.54</b>  | <b>287.36</b> | <b>4</b> | <b>1</b> | <b>0</b> |
| 35 | Ergotamine                      | 2.08         | 581.67        | 10       | 3        | 1        |
| 36 | <b>Nicergoline</b>              | <b>3.85</b>  | <b>484.39</b> | <b>6</b> | <b>0</b> | <b>0</b> |
| 37 | <b>Naltrexone</b>               | <b>1.35</b>  | <b>341.41</b> | <b>5</b> | <b>2</b> | <b>0</b> |
| 38 | <b>Apomorphine</b>              | <b>2.89</b>  | <b>267.33</b> | <b>3</b> | <b>2</b> | <b>0</b> |
| 39 | <b>Homatropinemethylbromide</b> | <b>-2.19</b> | <b>290.38</b> | <b>4</b> | <b>1</b> | <b>0</b> |
| 40 | Atracuriumbesylate              | -1.59        | 929.16        | 14       | 0        | 2        |
| 41 | <b>Scopolamine</b>              | <b>1.05</b>  | <b>303.36</b> | <b>5</b> | <b>1</b> | <b>0</b> |
| 42 | Irinotecan                      | 4.1          | 586.69        | 10       | 1        | 1        |
| 43 | <b>Pentoxifylline</b>           | <b>0.65</b>  | <b>278.31</b> | <b>7</b> | <b>0</b> | <b>0</b> |
| 44 | <b>Enprofylline</b>             | <b>-0.14</b> | <b>194.19</b> | <b>6</b> | <b>2</b> | <b>0</b> |
| 45 | <b>Nalbuphine</b>               | <b>1.71</b>  | <b>357.45</b> | <b>5</b> | <b>3</b> | <b>0</b> |
| 46 | <b>Levorphanol</b>              | <b>3.4</b>   | <b>257.38</b> | <b>2</b> | <b>1</b> | <b>0</b> |
| 47 | <b>Cocaine</b>                  | <b>2.17</b>  | <b>303.36</b> | <b>5</b> | <b>0</b> | <b>0</b> |
| 48 | <b>Quinidine</b>                | <b>3.06</b>  | <b>324.42</b> | <b>4</b> | <b>1</b> | <b>0</b> |
| 49 | <b>Buprenorphine</b>            | <b>4.87</b>  | <b>467.65</b> | <b>5</b> | <b>2</b> | <b>0</b> |
| 50 | <b>Hydrocodone</b>              | <b>1.73</b>  | <b>299.37</b> | <b>4</b> | <b>0</b> | <b>0</b> |
| 51 | <b>Physostigmine</b>            | <b>1.94</b>  | <b>275.35</b> | <b>5</b> | <b>1</b> | <b>0</b> |
| 52 | <b>Dimenhydrinate</b>           | <b>3.5</b>   | <b>255.36</b> | <b>2</b> | <b>0</b> | <b>0</b> |
| 53 | <b>Topotecan</b>                | <b>2.03</b>  | <b>421.45</b> | <b>8</b> | <b>2</b> | <b>0</b> |
| 54 | Ergoloidmesylate                | 2.83         | 611.74        | 10       | 3        | 1        |
| 55 | <b>Pilocarpine</b>              | <b>-0.24</b> | <b>208.26</b> | <b>4</b> | <b>0</b> | <b>0</b> |
| 56 | Deserpidine                     | 4.98         | 578.66        | 10       | 1        | 1        |
| 57 | <b>Papaverine</b>               | <b>3.52</b>  | <b>339.39</b> | <b>5</b> | <b>0</b> | <b>0</b> |
| 58 | Rescinnamine                    | 5.43         | 634.73        | 11       | 1        | 3        |
| 59 | <b>Naloxone</b>                 | <b>1.12</b>  | <b>327.38</b> | <b>5</b> | <b>2</b> | <b>0</b> |
| 60 | <b>Pergolide</b>                | <b>3.97</b>  | <b>314.5</b>  | <b>2</b> | <b>1</b> | <b>0</b> |
| 61 | <b>Oxymorphone</b>              | <b>0.48</b>  | <b>301.34</b> | <b>5</b> | <b>2</b> | <b>0</b> |
| 62 | Tubocurarine                    | 1.99         | 609.74        | 8        | 2        | 1        |
| 63 | Bromocriptine                   | 3.6          | 654.61        | 10       | 3        | 1        |
| 64 | <b>Aminophylline</b>            | <b>-0.01</b> | <b>180.17</b> | <b>6</b> | <b>1</b> | <b>0</b> |
| 65 | <b>Ergometrine</b>              | <b>1.36</b>  | <b>325.41</b> | <b>5</b> | <b>3</b> | <b>0</b> |
| 66 | <b>Oxtriphylline</b>            | <b>-3.55</b> | <b>179.16</b> | <b>6</b> | <b>0</b> | <b>0</b> |
| 67 | Metocurine                      | -1.41        | 652.83        | 8        | 0        | 1        |

|     |                                            |              |                |           |           |          |
|-----|--------------------------------------------|--------------|----------------|-----------|-----------|----------|
| 68  | <b>Yohimbine</b>                           | <b>3.22</b>  | <b>354.45</b>  | <b>5</b>  | <b>2</b>  | <b>0</b> |
| 69  | <b>Colchicine</b>                          | <b>1.1</b>   | <b>399.44</b>  | <b>7</b>  | <b>1</b>  | <b>0</b> |
| 70  | <b>Tiotropium</b>                          | <b>-1.94</b> | <b>392.52</b>  | <b>5</b>  | <b>1</b>  | <b>0</b> |
| 71  | <b>Theobromine</b>                         | <b>-0.95</b> | <b>180.17</b>  | <b>6</b>  | <b>1</b>  | <b>0</b> |
| 72  | <b>Ajmaline</b>                            | <b>2.56</b>  | <b>326.44</b>  | <b>4</b>  | <b>2</b>  | <b>0</b> |
| 73  | <b>5-Methoxy-N,N-diisopropyltryptamine</b> | <b>3.68</b>  | <b>274.41</b>  | <b>3</b>  | <b>1</b>  | <b>0</b> |
| 74  | <b>Dihydroetorphine</b>                    | <b>3.74</b>  | <b>413.56</b>  | <b>5</b>  | <b>2</b>  | <b>0</b> |
| 75  | <b>Diamorphine</b>                         | <b>1.61</b>  | <b>369.42</b>  | <b>6</b>  | <b>0</b>  | <b>0</b> |
| 76  | <b>Ethylmorphine</b>                       | <b>1.79</b>  | <b>313.4</b>   | <b>4</b>  | <b>1</b>  | <b>0</b> |
| 77  | <b>Cyprenorphine</b>                       | <b>3.52</b>  | <b>423.55</b>  | <b>5</b>  | <b>2</b>  | <b>0</b> |
| 78  | <b>Fenethylline</b>                        | <b>1.98</b>  | <b>341.42</b>  | <b>7</b>  | <b>1</b>  | <b>0</b> |
| 79  | <b>Etorphine</b>                           | <b>3.71</b>  | <b>411.54</b>  | <b>5</b>  | <b>2</b>  | <b>0</b> |
| 80  | <b>Benzoylcegonine</b>                     | <b>2.25</b>  | <b>289.33</b>  | <b>5</b>  | <b>1</b>  | <b>0</b> |
| 81  | <b>Ecgonine</b>                            | <b>-0.18</b> | <b>185.22</b>  | <b>4</b>  | <b>2</b>  | <b>0</b> |
| 82  | <b>Desomorphine</b>                        | <b>2.76</b>  | <b>271.36</b>  | <b>3</b>  | <b>1</b>  | <b>0</b> |
| 83  | <b>Drotebanol</b>                          | <b>1.39</b>  | <b>333.43</b>  | <b>5</b>  | <b>2</b>  | <b>0</b> |
| 84  | <b>Diprenorphine</b>                       | <b>3.55</b>  | <b>425.57</b>  | <b>5</b>  | <b>2</b>  | <b>0</b> |
| 85  | <b>Dihydrocodeine</b>                      | <b>1.92</b>  | <b>301.39</b>  | <b>4</b>  | <b>1</b>  | <b>0</b> |
| 86  | <b>Dihydromorphine</b>                     | <b>1.61</b>  | <b>287.36</b>  | <b>4</b>  | <b>2</b>  | <b>0</b> |
| 87  | <b>Tropinone</b>                           | <b>0.29</b>  | <b>139.2</b>   | <b>2</b>  | <b>0</b>  | <b>0</b> |
| 88  | <b>8-azaxanthine</b>                       | <b>-1.23</b> | <b>153.1</b>   | <b>7</b>  | <b>3</b>  | <b>0</b> |
| 89  | <b>7-Hydroxystaurosporine</b>              | <b>3.42</b>  | <b>482.54</b>  | <b>8</b>  | <b>3</b>  | <b>0</b> |
| 90  | <b>Staurosporine</b>                       | <b>3.88</b>  | <b>466.54</b>  | <b>7</b>  | <b>2</b>  | <b>0</b> |
| 91  | <b>Xanthine</b>                            | <b>-1.09</b> | <b>152.11</b>  | <b>6</b>  | <b>3</b>  | <b>0</b> |
| 92  | <b>K-252a</b>                              | <b>3.43</b>  | <b>476.48</b>  | <b>8</b>  | <b>2</b>  | <b>0</b> |
| 93  | <b>Duvoglustat</b>                         | <b>-2.4</b>  | <b>163.17</b>  | <b>5</b>  | <b>5</b>  | <b>0</b> |
| 94  | <b>Pseudotropine</b>                       | <b>0.48</b>  | <b>141.21</b>  | <b>2</b>  | <b>1</b>  | <b>0</b> |
| 95  | <b>Berberine</b>                           | <b>0.2</b>   | <b>336.37</b>  | <b>5</b>  | <b>0</b>  | <b>0</b> |
| 96  | <b>Arecoline</b>                           | <b>0.79</b>  | <b>155.2</b>   | <b>3</b>  | <b>0</b>  | <b>0</b> |
| 97  | <b>Methylecgonine</b>                      | <b>0.44</b>  | <b>199.25</b>  | <b>4</b>  | <b>1</b>  | <b>0</b> |
| 98  | <b>Camptothecin</b>                        | <b>2.03</b>  | <b>348.36</b>  | <b>6</b>  | <b>1</b>  | <b>0</b> |
| 99  | <b>Lysergic acid diethylamide</b>          | <b>2.66</b>  | <b>323.44</b>  | <b>4</b>  | <b>1</b>  | <b>0</b> |
| 100 | <b>Omacetaxinermepesuccinate</b>           | <b>1.96</b>  | <b>545.63</b>  | <b>10</b> | <b>2</b>  | <b>1</b> |
| 101 | <b>Voacamine</b>                           | <b>7.71</b>  | <b>704.91</b>  | <b>9</b>  | <b>2</b>  | <b>2</b> |
| 102 | <b>Phenserine</b>                          | <b>3.64</b>  | <b>337.42</b>  | <b>5</b>  | <b>1</b>  | <b>0</b> |
| 103 | <b>Altropane</b>                           | <b>4.5</b>   | <b>429.27</b>  | <b>3</b>  | <b>0</b>  | <b>0</b> |
| 104 | <b>Migalastat</b>                          | <b>-2.4</b>  | <b>163.17</b>  | <b>5</b>  | <b>5</b>  | <b>0</b> |
| 105 | <b>Lobeline</b>                            | <b>3.73</b>  | <b>337.46</b>  | <b>3</b>  | <b>1</b>  | <b>0</b> |
| 106 | <b>Vintafolide</b>                         | <b>-5.01</b> | <b>1917.07</b> | <b>47</b> | <b>25</b> | <b>3</b> |
| 107 | <b>NS-2359</b>                             | <b>4.56</b>  | <b>314.26</b>  | <b>2</b>  | <b>0</b>  | <b>0</b> |

|     |                                        |              |               |          |          |          |
|-----|----------------------------------------|--------------|---------------|----------|----------|----------|
| 108 | <b>Cositecan</b>                       | <b>4.75</b>  | <b>448.6</b>  | <b>6</b> | <b>1</b> | <b>0</b> |
| 109 | <b>Rivanicline</b>                     | <b>1.3</b>   | <b>162.24</b> | <b>2</b> | <b>1</b> | <b>0</b> |
| 110 | <b>Rubitecan</b>                       | <b>2.24</b>  | <b>393.36</b> | <b>9</b> | <b>1</b> | <b>0</b> |
| 111 | <b>Nalmefene</b>                       | <b>2.76</b>  | <b>339.44</b> | <b>4</b> | <b>2</b> | <b>0</b> |
| 112 | <b>Naxifylline</b>                     | <b>2.65</b>  | <b>344.42</b> | <b>7</b> | <b>1</b> | <b>0</b> |
| 113 | <b>Propentofylline</b>                 | <b>1.53</b>  | <b>306.37</b> | <b>7</b> | <b>0</b> | <b>0</b> |
| 114 | Midostaurin                            | 4.69         | 570.65        | 8        | 1        | 1        |
| 115 | <b>Gimatecan</b>                       | <b>3.24</b>  | <b>447.49</b> | <b>8</b> | <b>1</b> | <b>0</b> |
| 116 | <b>Sparteine</b>                       | <b>2.9</b>   | <b>234.39</b> | <b>2</b> | <b>0</b> | <b>0</b> |
| 117 | <b>Drotaverine</b>                     | <b>4.54</b>  | <b>397.51</b> | <b>5</b> | <b>1</b> | <b>0</b> |
| 118 | <b>Capsaicin</b>                       | <b>3.1</b>   | <b>305.42</b> | <b>4</b> | <b>2</b> | <b>0</b> |
| 119 | <b>Methylnaltrexone</b>                | <b>-2.63</b> | <b>356.44</b> | <b>5</b> | <b>2</b> | <b>0</b> |
| 120 | <b>3-isobutyl-1-methyl-7H-xanthine</b> | <b>1.12</b>  | <b>222.25</b> | <b>6</b> | <b>1</b> | <b>0</b> |
| 121 | <b>Ioflupane I-123</b>                 | <b>4.8</b>   | <b>431.29</b> | <b>3</b> | <b>0</b> | <b>0</b> |
| 122 | <b>Uric acid</b>                       | <b>-1.44</b> | <b>168.11</b> | <b>7</b> | <b>4</b> | <b>0</b> |
| 123 | <b>Acridinium</b>                      | <b>0.59</b>  | <b>484.66</b> | <b>5</b> | <b>1</b> | <b>0</b> |
| 124 | <b>Fentonium</b>                       | <b>0.73</b>  | <b>484.62</b> | <b>5</b> | <b>1</b> | <b>0</b> |
| 125 | Naloxegol                              | 0.5          | 651.79        | 12       | 2        | 2        |
| 126 | <b>Xanthinol</b>                       | <b>-1.18</b> | <b>311.34</b> | <b>9</b> | <b>2</b> | <b>0</b> |
| 127 | <b>Zucapsaicin</b>                     | <b>3.1</b>   | <b>305.42</b> | <b>4</b> | <b>2</b> | <b>0</b> |
| 128 | <b>Pholcodine</b>                      | <b>1.29</b>  | <b>398.5</b>  | <b>6</b> | <b>1</b> | <b>0</b> |
| 129 | <b>Cimetropium</b>                     | <b>-2.06</b> | <b>358.46</b> | <b>5</b> | <b>1</b> | <b>0</b> |
| 130 | <b>Doxofylline</b>                     | <b>-0.13</b> | <b>266.26</b> | <b>8</b> | <b>0</b> | <b>0</b> |
| 131 | <b>Butylscopolamine</b>                | <b>-1.49</b> | <b>360.47</b> | <b>5</b> | <b>1</b> | <b>0</b> |
| 132 | <b>Homatropine</b>                     | <b>1.78</b>  | <b>275.35</b> | <b>4</b> | <b>1</b> | <b>0</b> |
| 133 | Dihydroergocornine                     | 2.15         | 563.7         | 10       | 3        | 1        |
| 134 | Epicriptine                            | 2.65         | 577.73        | 10       | 3        | 1        |
| 135 | <b>Methscopolamine</b>                 | <b>-2.93</b> | <b>318.39</b> | <b>5</b> | <b>1</b> | <b>0</b> |
| 136 | <b>Nonivamide</b>                      | <b>4.12</b>  | <b>293.41</b> | <b>4</b> | <b>2</b> | <b>0</b> |
| 137 | <b>Nalorphine</b>                      | <b>1.75</b>  | <b>311.38</b> | <b>4</b> | <b>2</b> | <b>0</b> |
| 138 | <b>Metoserpate</b>                     | <b>3.57</b>  | <b>428.53</b> | <b>7</b> | <b>1</b> | <b>0</b> |
| 139 | <b>Bicuculline</b>                     | <b>2.88</b>  | <b>367.36</b> | <b>7</b> | <b>0</b> | <b>0</b> |
| 140 | Thiocolchicoside                       | -0.16        | 563.62        | 11       | 5        | 2        |
| 141 | Vinflunine                             | 6.24         | 816.94        | 12       | 2        | 3        |
| 142 | <b>Psilocybin</b>                      | <b>1.02</b>  | <b>284.25</b> | <b>6</b> | <b>3</b> | <b>0</b> |
| 143 | <b>Anisodamine</b>                     | <b>0.85</b>  | <b>305.37</b> | <b>5</b> | <b>2</b> | <b>0</b> |
| 144 | <b>Axelopran</b>                       | <b>2.35</b>  | <b>457.62</b> | <b>7</b> | <b>4</b> | <b>0</b> |
| 145 | <b>Oxitropium</b>                      | <b>-2.56</b> | <b>332.42</b> | <b>5</b> | <b>1</b> | <b>0</b> |
| 146 | <b>Tetrahydropalmatine</b>             | <b>2.75</b>  | <b>355.43</b> | <b>5</b> | <b>0</b> | <b>0</b> |
| 147 | <b>Namitecan</b>                       | <b>0.86</b>  | <b>434.45</b> | <b>9</b> | <b>3</b> | <b>0</b> |

|     |                                           |              |               |           |          |          |
|-----|-------------------------------------------|--------------|---------------|-----------|----------|----------|
| 148 | <b>Vinpocetine</b>                        | <b>4.12</b>  | <b>350.46</b> | <b>4</b>  | <b>0</b> | <b>0</b> |
| 149 | <b>Exatecan</b>                           | <b>0.75</b>  | <b>435.45</b> | <b>7</b>  | <b>3</b> | <b>0</b> |
| 150 | Lurtotecan                                | 1.44         | 518.57        | 10        | 1        | 1        |
| 151 | <b>Moxaverine</b>                         | <b>4.88</b>  | <b>307.39</b> | <b>3</b>  | <b>0</b> | <b>0</b> |
| 152 | <b>AR-67</b>                              | <b>4.556</b> | <b>478.62</b> | <b>7</b>  | <b>2</b> | <b>0</b> |
| 153 | <b>10-hydroxycamptothecin</b>             | <b>1.52</b>  | <b>364.36</b> | <b>7</b>  | <b>2</b> | <b>0</b> |
| 154 | <b>Lisofylline</b>                        | <b>0.84</b>  | <b>280.33</b> | <b>7</b>  | <b>1</b> | <b>0</b> |
| 155 | Zalypsis                                  | 4.87         | 709.72        | 11        | 3        | 2        |
| 156 | <b>Belotecan</b>                          | <b>2.9</b>   | <b>433.51</b> | <b>7</b>  | <b>2</b> | <b>0</b> |
| 157 | <b>9-aminocamptothecin</b>                | <b>1.77</b>  | <b>363.37</b> | <b>7</b>  | <b>3</b> | <b>0</b> |
| 158 | <b>Samidorphan</b>                        | <b>1.31</b>  | <b>370.45</b> | <b>6</b>  | <b>4</b> | <b>0</b> |
| 159 | <b>Tonapofylline</b>                      | <b>3.1</b>   | <b>416.52</b> | <b>8</b>  | <b>2</b> | <b>0</b> |
| 160 | Patidegib                                 | 5.73         | 504.78        | 5         | 2        | 2        |
| 161 | <b>Rolofylline</b>                        | <b>3.95</b>  | <b>356.47</b> | <b>4</b>  | <b>1</b> | <b>0</b> |
| 162 | Solamargine                               | 2.41         | 868.07        | 16        | 9        | 3        |
| 163 | Pegamotecan                               | 3.38         | 980.98        | 20        | 2        | 2        |
| 164 | <b>Reproterol</b>                         | <b>-0.45</b> | <b>389.41</b> | <b>10</b> | <b>4</b> | <b>0</b> |
| 165 | Sacituzumabgovitecan                      | -3.19        | 1601.8        | 36        | 10       | 3        |
| 166 | <b>Cafedrine</b>                          | <b>0.99</b>  | <b>357.41</b> | <b>8</b>  | <b>2</b> | <b>0</b> |
| 167 | <b>Theodrenaline</b>                      | <b>-0.66</b> | <b>375.38</b> | <b>10</b> | <b>4</b> | <b>0</b> |
| 168 | <b>8-cyclopentyl-1,3-dipropylxanthine</b> | <b>3.24</b>  | <b>304.39</b> | <b>6</b>  | <b>1</b> | <b>0</b> |
| 169 | CT-2584                                   | 7.9          | 533.8         | 8         | 2        | 2        |
| 170 | <b>Ambroxolacefyllinate</b>               | <b>2.74</b>  | <b>378.11</b> | <b>3</b>  | <b>4</b> | <b>0</b> |
| 171 | <b>Bamifylline</b>                        | <b>1.9</b>   | <b>385.47</b> | <b>8</b>  | <b>1</b> | <b>0</b> |
| 172 | Atracurium                                | -1.59        | 929.16        | 14        | 0        | 2        |
| 173 | <b>Demecolcine</b>                        | <b>1.74</b>  | <b>371.43</b> | <b>6</b>  | <b>1</b> | <b>0</b> |
| 174 | Dihydroergocristine                       | 2.83         | 611.74        | 10        | 3        | 1        |
| 175 | <b>Vincamine</b>                          | <b>3.18</b>  | <b>354.45</b> | <b>5</b>  | <b>1</b> | <b>0</b> |
| 176 | Dihydroergocryptine                       | 2.68         | 577.73        | 10        | 3        | 1        |
| 177 | <b>Emetine</b>                            | <b>3.64</b>  | <b>480.65</b> | <b>6</b>  | <b>1</b> | <b>0</b> |
| 178 | <b>Terguride</b>                          | <b>3.17</b>  | <b>340.47</b> | <b>5</b>  | <b>2</b> | <b>0</b> |
| 179 | <b>Proxiphylline</b>                      | <b>-0.21</b> | <b>238.25</b> | <b>7</b>  | <b>1</b> | <b>0</b> |
| 180 | <b>Nicomorphine</b>                       | <b>2.5</b>   | <b>495.54</b> | <b>8</b>  | <b>0</b> | <b>0</b> |
| 181 | <b>Etybenzatropine</b>                    | <b>4.65</b>  | <b>321.46</b> | <b>2</b>  | <b>0</b> | <b>0</b> |
| 182 | <b>Nalfurafine</b>                        | <b>2.63</b>  | <b>476.57</b> | <b>7</b>  | <b>2</b> | <b>0</b> |
| 183 | <b>Metergoline</b>                        | <b>3.87</b>  | <b>403.53</b> | <b>5</b>  | <b>1</b> | <b>0</b> |
| 184 | <b>Prajmaline</b>                         | <b>-0.54</b> | <b>369.53</b> | <b>4</b>  | <b>2</b> | <b>0</b> |
| 185 | <b>Acefylline</b>                         | <b>-0.69</b> | <b>238.2</b>  | <b>8</b>  | <b>1</b> | <b>0</b> |
| 186 | Bietaserpine                              | 5.86         | 707.87        | 12        | 0        | 3        |
| 187 | Etamiphylline                             | 0.84         | 279.34        | 7         | 0        | 0        |

|     |                                       |              |                |           |          |          |
|-----|---------------------------------------|--------------|----------------|-----------|----------|----------|
| 188 | <b>Phenazocine</b>                    | <b>4.72</b>  | <b>321.46</b>  | <b>2</b>  | <b>1</b> | <b>0</b> |
| 189 | <b>Pentifylline</b>                   | <b>2.51</b>  | <b>264.33</b>  | <b>6</b>  | <b>0</b> | <b>0</b> |
| 190 | Alcuronium                            | -2.45        | 666.91         | 6         | 2        | 1        |
| 191 | <b>Lorajmine</b>                      | <b>3.66</b>  | <b>402.92</b>  | <b>5</b>  | <b>1</b> | <b>0</b> |
| 192 | <b>Tretoquinol</b>                    | <b>2.12</b>  | <b>345.339</b> | <b>6</b>  | <b>3</b> | <b>0</b> |
| 193 | <b>Hydroquinine</b>                   | <b>3.29</b>  | <b>326.44</b>  | <b>4</b>  | <b>1</b> | <b>0</b> |
| 194 | <b>Vinburnine</b>                     | <b>3.78</b>  | <b>294.4</b>   | <b>3</b>  | <b>0</b> | <b>0</b> |
| 195 | <b>Dimemorfan</b>                     | <b>4.33</b>  | <b>255.41</b>  | <b>1</b>  | <b>0</b> | <b>0</b> |
| 196 | <b>Buftylline</b>                     | <b>-0.01</b> | <b>180.17</b>  | <b>6</b>  | <b>1</b> | <b>0</b> |
| 197 | <b>Methylatropine</b>                 | <b>-2.21</b> | <b>304.41</b>  | <b>4</b>  | <b>1</b> | <b>0</b> |
| 198 | <b>Dehydroemetine</b>                 | <b>3.3</b>   | <b>478.63</b>  | <b>6</b>  | <b>1</b> | <b>0</b> |
| 199 | <b>Harmaline</b>                      | <b>2.68</b>  | <b>214.27</b>  | <b>3</b>  | <b>1</b> | <b>0</b> |
| 200 | <b>Bromotheophylline</b>              | <b>1.12</b>  | <b>259.06</b>  | <b>6</b>  | <b>1</b> | <b>0</b> |
| 201 | <b>Furafylline</b>                    | <b>0.94</b>  | <b>260.25</b>  | <b>7</b>  | <b>1</b> | <b>0</b> |
| 202 | Tetrandrine                           | 6.55         | 622.76         | 8         | 0        | 2        |
| 203 | <b>8-chlorotheophylline</b>           | <b>0.99</b>  | <b>214.61</b>  | <b>6</b>  | <b>1</b> | <b>0</b> |
| 204 | <b>Dextrorphan</b>                    | <b>3.4</b>   | <b>257.38</b>  | <b>2</b>  | <b>1</b> | <b>0</b> |
| 205 | <b>7-ethyl-10-hydroxycamptothecin</b> | <b>2.67</b>  | <b>392.41</b>  | <b>7</b>  | <b>2</b> | <b>0</b> |
| 206 | <b>Rauwolfiaserpentina root</b>       | <b>3.41</b>  | <b>352.43</b>  | <b>5</b>  | <b>1</b> | <b>0</b> |
| 207 | Almitrine                             | 6.14         | 477.56         | 7         | 2        | 1        |
| 208 | <b>Morphine glucuronide</b>           | <b>-0.73</b> | <b>461.47</b>  | <b>10</b> | <b>5</b> | <b>0</b> |
| 209 | Firtecانpegol                         | 7.22         | 2300.32        | 49        | 8        | 4        |
| 210 | <b>18-methoxycoronaridine</b>         | <b>3.55</b>  | <b>368.48</b>  | <b>5</b>  | <b>1</b> | <b>0</b> |
| 211 | <b>Hydroquinidine</b>                 | <b>3.29</b>  | <b>326.44</b>  | <b>4</b>  | <b>1</b> | <b>0</b> |
| 212 | <b>Posiphen</b>                       | <b>3.64</b>  | <b>337.42</b>  | <b>5</b>  | <b>1</b> | <b>0</b> |
| 213 | <b>Dihydrocapsiate</b>                | <b>4.74</b>  | <b>308.42</b>  | <b>4</b>  | <b>1</b> | <b>0</b> |
| 214 | Naldemedine                           | 3.65         | 570.65         | 10        | 4        | 1        |
| 215 | <b>Deptropine</b>                     | <b>4.39</b>  | <b>333.48</b>  | <b>2</b>  | <b>0</b> | <b>0</b> |
| 216 | <b>Tenidap</b>                        | <b>3.34</b>  | <b>320.76</b>  | <b>5</b>  | <b>3</b> | <b>0</b> |
| 217 | Loxicodegol                           | 0.36         | 595.73         | 11        | 1        | 2        |
| 218 | <b>Lucerastat</b>                     | <b>-0.72</b> | <b>219.28</b>  | <b>5</b>  | <b>4</b> | <b>0</b> |
| 219 | <b>PCS-499</b>                        | <b>0.84</b>  | <b>280.337</b> | <b>7</b>  | <b>1</b> | <b>0</b> |
| 220 | <b>Colchiceine</b>                    | <b>0.83</b>  | <b>385.42</b>  | <b>7</b>  | <b>2</b> | <b>0</b> |
| 221 | <b>Variolin B</b>                     | <b>-0.15</b> | <b>293.29</b>  | <b>8</b>  | <b>5</b> | <b>0</b> |
| 222 | Deacetoxyvinzolidine                  | 6.21         | 826.43         | 12        | 2        | 3        |
| 223 | <b>Harmine</b>                        | <b>2.63</b>  | <b>212.25</b>  | <b>3</b>  | <b>1</b> | <b>0</b> |
| 224 | Raubasine                             | 2.83         | 611.74         | 10        | 3        | 1        |
| 225 | <b>Strychnine</b>                     | <b>1.84</b>  | <b>334.42</b>  | <b>4</b>  | <b>0</b> | <b>0</b> |
| 226 | <b>Butropium</b>                      | <b>0.88</b>  | <b>452.62</b>  | <b>5</b>  | <b>1</b> | <b>0</b> |
| 227 | <b>Diflomotecan</b>                   | <b>1.25</b>  | <b>398.37</b>  | <b>6</b>  | <b>1</b> | <b>0</b> |

|     |                                                  |              |               |          |          |          |
|-----|--------------------------------------------------|--------------|---------------|----------|----------|----------|
| 228 | <b>Nazartinib</b>                                | <b>3.28</b>  | <b>495.03</b> | <b>8</b> | <b>1</b> | <b>0</b> |
| 229 | Dihydroergotoxine                                | 2.09         | 583.69        | 10       | 3        | 1        |
| 230 | 3,5'-dihydroxythalifaboramine                    | 5.9          | 684.79        | 11       | 3        | 3        |
| 231 | 3-hydroxy-6'-desmethyl-9-O-methylthalifaboramine | 5.96         | 668.79        | 10       | 2        | 2        |
| 232 | 3-hydroxythalifaboramine                         | 5.99         | 668.79        | 10       | 2        | 2        |
| 233 | 5'-hydroxythalifaboramine                        | 5.99         | 668.79        | 10       | 2        | 2        |
| 234 | 6'-desmethylthalifaboramine                      | 5.78         | 638.76        | 9        | 2        | 2        |
| 235 | Alpha-tomatine                                   | -0.92        | 1034.2        | 22       | 13       | 3        |
| 236 | Berberine                                        | 6.24         | 608.74        | 8        | 1        | 2        |
| 237 | <b>Berberine</b>                                 | <b>0.2</b>   | <b>336.37</b> | <b>5</b> | <b>0</b> | <b>0</b> |
| 238 | Betanin                                          | -6.03        | 550.47        | 15       | 8        | 3        |
| 239 | <b>Brucine</b>                                   | <b>1.46</b>  | <b>394.47</b> | <b>6</b> | <b>0</b> | <b>0</b> |
| 240 | <b>Brucine N-oxide</b>                           | <b>1.42</b>  | <b>410.47</b> | <b>7</b> | <b>0</b> | <b>0</b> |
| 241 | <b>Camptothecin</b>                              | <b>2.03</b>  | <b>348.36</b> | <b>6</b> | <b>1</b> | <b>0</b> |
| 242 | <b>Chelerythrine</b>                             | <b>0.75</b>  | <b>348.38</b> | <b>5</b> | <b>0</b> | <b>0</b> |
| 243 | <b>Cis-Zeatin</b>                                | <b>1.04</b>  | <b>219.25</b> | <b>6</b> | <b>3</b> | <b>0</b> |
| 244 | <b>Cryptolepine</b>                              | <b>3.86</b>  | <b>232.29</b> | <b>2</b> | <b>0</b> | <b>0</b> |
| 245 | Dehydrotomatine                                  | -1.1         | 1032.18       | 22       | 13       | 3        |
| 246 | Emarginatine F                                   | 3.64         | 918.9         | 20       | 2        | 2        |
| 247 | Emarginatine G                                   | 3.3          | 924.91        | 21       | 1        | 2        |
| 248 | Fangchinoline                                    | 6.27         | 608.74        | 8        | 1        | 2        |
| 249 | Harmaline                                        | 6.54         | 409.19        | 3        | 0        | 1        |
| 250 | <b>Harmalol</b>                                  | <b>3.02</b>  | <b>323.35</b> | <b>6</b> | <b>2</b> | <b>0</b> |
| 251 | <b>Harmane</b>                                   | <b>2.59</b>  | <b>182.23</b> | <b>2</b> | <b>1</b> | <b>0</b> |
| 252 | <b>Harmine</b>                                   | <b>2.63</b>  | <b>212.25</b> | <b>3</b> | <b>1</b> | <b>0</b> |
| 253 | <b>Harmol</b>                                    | <b>1.89</b>  | <b>198.22</b> | <b>3</b> | <b>2</b> | <b>0</b> |
| 254 | Homoharringtonine                                | 1.96         | 545.63        | 10       | 2        | 1        |
| 255 | <b>Hydrastine</b>                                | <b>2.83</b>  | <b>383.4</b>  | <b>7</b> | <b>0</b> | <b>0</b> |
| 256 | <b>Isostrychnine</b>                             | <b>1.46</b>  | <b>334.42</b> | <b>4</b> | <b>1</b> | <b>0</b> |
| 257 | <b>Lycoricidinol</b>                             | <b>-1.12</b> | <b>307.26</b> | <b>8</b> | <b>5</b> | <b>0</b> |
| 258 | <b>Lycorine</b>                                  | <b>0.54</b>  | <b>287.31</b> | <b>5</b> | <b>2</b> | <b>0</b> |
| 259 | Mahanimbicine                                    | 7.15         | 331.46        | 2        | 1        | 1        |
| 260 | Mahanimbine                                      | 7.1          | 331.46        | 2        | 1        | 1        |
| 261 | Mahanine                                         | 6.15         | 333.43        | 3        | 2        | 1        |
| 262 | <b>Marcanines A</b>                              | <b>1.92</b>  | <b>239.23</b> | <b>4</b> | <b>1</b> | <b>0</b> |
| 263 | <b>Matrine</b>                                   | <b>1.98</b>  | <b>248.37</b> | <b>3</b> | <b>0</b> | <b>0</b> |
| 264 | <b>N-(4-hydroxyundecanoyl)anabasine</b>          | <b>4.27</b>  | <b>346.51</b> | <b>4</b> | <b>1</b> | <b>0</b> |
| 265 | <b>Neocryptolepine</b>                           | <b>3.86</b>  | <b>232.29</b> | <b>2</b> | <b>0</b> | <b>0</b> |
| 266 | <b>N-n-octanoylnornicotine</b>                   | <b>3.87</b>  | <b>274.41</b> | <b>3</b> | <b>0</b> | <b>0</b> |

|     |                                                               |       |        |    |   |   |
|-----|---------------------------------------------------------------|-------|--------|----|---|---|
| 267 | Noscapine                                                     | 2.81  | 413.43 | 8  | 0 | 0 |
| 268 | Papaverine                                                    | 3.52  | 339.39 | 5  | 0 | 0 |
| 269 | Physostigmine                                                 | 1.94  | 275.35 | 5  | 1 | 0 |
| 270 | Reserpine acid                                                | 2.33  | 400.48 | 7  | 3 | 0 |
| 271 | Rhyncophylline                                                | 2.83  | 384.48 | 6  | 1 | 0 |
| 272 | Rohitukine                                                    | 1.13  | 305.33 | 6  | 3 | 0 |
| 273 | Sanguinarine                                                  | 0.8   | 332.33 | 5  | 0 | 0 |
| 274 | Solamargine                                                   | 2.41  | 868.07 | 16 | 9 | 3 |
| 275 | Strychnine                                                    | 1.84  | 334.42 | 4  | 0 | 0 |
| 276 | Tetrandrine                                                   | 6.55  | 622.76 | 8  | 0 | 2 |
| 277 | Tomatidenol                                                   | 5.73  | 413.65 | 3  | 2 | 1 |
| 278 | Tomatidine                                                    | 5.92  | 415.66 | 3  | 2 | 1 |
| 279 | Vinblastine                                                   | 5.56  | 810.99 | 13 | 3 | 3 |
| 280 | Vincamine                                                     | 3.18  | 354.45 | 5  | 1 | 0 |
| 281 | Vincristine                                                   | 4.95  | 824.97 | 14 | 3 | 2 |
| 282 | (-)-anonnaine                                                 | 3.25  | 265.31 | 3  | 1 | 0 |
| 283 | (+)-tylophorinidine                                           | 2.75  | 365.43 | 5  | 2 | 0 |
| 284 | (R)-antofine                                                  | 4.05  | 363.46 | 4  | 0 | 0 |
| 285 | (R)-cryptopleurine                                            | 4.55  | 377.48 | 4  | 0 | 0 |
| 286 | (R)-tylophorine                                               | 3.64  | 393.48 | 5  | 0 | 0 |
| 287 | (S)-tyloindicine I                                            | 2.93  | 409.48 | 6  | 1 | 0 |
| 288 | 11-beta-hydroxycephalotaxine<br>beta-N-oxide                  | -0.04 | 347.37 | 7  | 2 | 0 |
| 289 | 5alpha-O-(3'-dimethylamino-3'-<br>phenylpropionyl) taxinine M | 4.78  | 861.94 | 16 | 1 | 2 |
| 290 | 9-Aminocamptothecin                                           | 1.77  | 363.37 | 7  | 3 | 0 |
| 291 | 9-methoxycanthin-6-one                                        | 2.72  | 250.26 | 4  | 0 | 0 |
| 292 | 9-methoxycanthin-6-one 3N-oxide                               | 1.31  | 266.26 | 5  | 0 | 0 |
| 293 | Antofine                                                      | 4.05  | 363.46 | 4  | 0 | 0 |
| 294 | beta-carboline-1-propionic acid                               | 2.31  | 240.26 | 4  | 2 | 0 |
| 295 | canthin-6-one                                                 | 2.69  | 220.23 | 3  | 0 | 0 |
| 296 | canthin-6-one 9-O-beta-<br>glucopyranoside                    | 0.4   | 398.37 | 9  | 4 | 0 |
| 297 | Capsaicin                                                     | 3.1   | 305.42 | 4  | 2 | 0 |
| 298 | Cephalotaxine alpha-N-oxide                                   | 0.95  | 331.37 | 6  | 1 | 0 |
| 299 | Cephalotaxine beta-N-oxide                                    | 0.95  | 331.37 | 6  | 1 | 0 |
| 300 | Cepharanthine                                                 | 6.59  | 606.72 | 8  | 0 | 2 |
| 301 | Corydaline                                                    | 3.08  | 369.46 | 5  | 0 | 0 |
| 302 | Cycleanine                                                    | 6.75  | 622.76 | 8  | 0 | 2 |
| 303 | Ellipticine                                                   | 4.28  | 246.31 | 2  | 1 | 0 |
| 304 | Evodiamine                                                    | 2.82  | 303.37 | 4  | 1 | 0 |
| 305 | Holacurtine                                                   | 4.04  | 491.71 | 6  | 2 | 0 |



|     |                                                      |             |               |          |          |          |
|-----|------------------------------------------------------|-------------|---------------|----------|----------|----------|
| 306 | <b>Holacurtinol</b>                                  | <b>2.04</b> | <b>491.67</b> | <b>7</b> | <b>4</b> | <b>0</b> |
| 307 | <b>Holamine</b>                                      | <b>3.5</b>  | <b>315.5</b>  | <b>2</b> | <b>2</b> | <b>0</b> |
| 308 | <b>Isocephalotaxine</b>                              | <b>1</b>    | <b>315.37</b> | <b>5</b> | <b>1</b> | <b>0</b> |
| 309 | Isotetrandrine                                       | 6.55        | 622.76        | 8        | 0        | 2        |
| 310 | <b>liriodenine</b>                                   | <b>3.3</b>  | <b>275.26</b> | <b>4</b> | <b>0</b> | <b>0</b> |
| 311 | <b>Psychotrine</b>                                   | <b>4.71</b> | <b>478.63</b> | <b>6</b> | <b>0</b> | <b>0</b> |
| 312 | <b>Secoantofine</b>                                  | <b>3.76</b> | <b>365.47</b> | <b>4</b> | <b>0</b> | <b>0</b> |
| 313 | <b>Tubulosine</b>                                    | <b>4.86</b> | <b>475.63</b> | <b>6</b> | <b>3</b> | <b>0</b> |
| 314 | <b>Tylocrebrine</b>                                  | <b>3.84</b> | <b>393.48</b> | <b>5</b> | <b>0</b> | <b>0</b> |
| 315 | <b>tyloindicine F</b>                                | <b>3.65</b> | <b>381.47</b> | <b>5</b> | <b>1</b> | <b>0</b> |
| 316 | <b>tyloindicine G</b>                                | <b>2.65</b> | <b>409.48</b> | <b>6</b> | <b>1</b> | <b>0</b> |
| 317 | <b>tylophoridicine C</b>                             | <b>2.71</b> | <b>381.43</b> | <b>6</b> | <b>2</b> | <b>0</b> |
| 318 | <b>tylophoridicine F</b>                             | <b>3.02</b> | <b>395.45</b> | <b>6</b> | <b>1</b> | <b>0</b> |
| 319 | Vincristine sulfate                                  | 4.95        | 824.97        | 14       | 3        | 2        |
| 320 | <b>(S)-tylophorine</b>                               | <b>3.64</b> | <b>393.48</b> | <b>5</b> | <b>0</b> | <b>0</b> |
| 321 | <b>6-O-desmethylanantofine</b>                       | <b>3.51</b> | <b>349.43</b> | <b>4</b> | <b>1</b> | <b>0</b> |
| 322 | <b>13(R)-antofine-N-oxide</b>                        | <b>4.01</b> | <b>379.46</b> | <b>5</b> | <b>0</b> | <b>0</b> |
| 323 | <b>13(R)-14(R)-hydroxyantofine-N-oxide</b>           | <b>3.02</b> | <b>395.45</b> | <b>6</b> | <b>1</b> | <b>0</b> |
| 324 | <b>7-methoxy-beta-carboline-1-propionic acid</b>     | <b>2.34</b> | <b>270.29</b> | <b>5</b> | <b>2</b> | <b>0</b> |
| 325 | <b>4-methoxycarbonyl-5,10-benzogquinolinequinone</b> | <b>2.08</b> | <b>267.24</b> | <b>5</b> | <b>0</b> | <b>0</b> |
| 326 | <b>6-O-desmethy secoantofine</b>                     | <b>3.22</b> | <b>351.45</b> | <b>4</b> | <b>1</b> | <b>0</b> |
| 327 | <b>Saprosmine A</b>                                  | <b>2.37</b> | <b>285.3</b>  | <b>5</b> | <b>1</b> | <b>0</b> |
| 328 | <b>Saprosmine B</b>                                  | <b>2.75</b> | <b>299.33</b> | <b>5</b> | <b>1</b> | <b>0</b> |
| 329 | 2-alpha-acetoxy-2'beta-deacetylaustrospicatin        | 5.89        | 783.91        | 14       | 1        | 3        |
| 330 | <b>9-hydroxycanthin-6-one</b>                        | <b>1.99</b> | <b>236.23</b> | <b>4</b> | <b>1</b> | <b>0</b> |
| 331 | <b>15-alpha-Hydroxyholamine</b>                      | <b>2.58</b> | <b>331.5</b>  | <b>3</b> | <b>3</b> | <b>0</b> |
| 332 | <b>17-epi-Holacurtine</b>                            | <b>4.04</b> | <b>491.71</b> | <b>6</b> | <b>2</b> | <b>0</b> |
| 333 | <b>3-alpha-Amino-14-beta-hydroxypregnan-20-one</b>   | <b>2.74</b> | <b>333.52</b> | <b>3</b> | <b>3</b> | <b>0</b> |
| 334 | <b>17-epi-N-Demethylholacurtine</b>                  | <b>3.13</b> | <b>477.69</b> | <b>6</b> | <b>3</b> | <b>0</b> |
| 335 | <b>N-Demethylholacurtine</b>                         | <b>3.13</b> | <b>477.69</b> | <b>6</b> | <b>3</b> | <b>0</b> |
| 336 | <b>(S)-isotylocrebrine</b>                           | <b>3.84</b> | <b>393.48</b> | <b>5</b> | <b>0</b> | <b>0</b> |
| 337 | <b>Isotylocrebrine</b>                               | <b>3.84</b> | <b>393.48</b> | <b>5</b> | <b>0</b> | <b>0</b> |
| 338 | <b>7-desmethyltylophorine</b>                        | <b>3.33</b> | <b>379.46</b> | <b>5</b> | <b>1</b> | <b>0</b> |
| 339 | 1',2',3',4'-tetrahydrotubulosine                     | 5.26        | 471.6         | 6        | 2        | 1        |
| 340 | <b>Reticuline</b>                                    | <b>2.38</b> | <b>329.4</b>  | <b>5</b> | <b>2</b> | <b>0</b> |

**Note: Bold entries were taken for further analysis**



**Table S2:** Drug-likeness and Toxicity risk assessment of Artemisinin and alkaloids

| S. No. | Compounds Name                            | Druglikeness  | Mutagenic   | Tumorigenic | Reproductive Effective | Irritant    |
|--------|-------------------------------------------|---------------|-------------|-------------|------------------------|-------------|
| Ref    | Artemisinin                               | -1.97         | None        | None        | High                   | High        |
| 1      | Uric acid                                 | 2.923         | high        | none        | high                   | none        |
| 2      | <b>Xanthine</b>                           | <b>3.2262</b> | <b>none</b> | <b>none</b> | <b>none</b>            | <b>none</b> |
| 3      | <b>8-cyclopentyl-1,3-dipropylxanthine</b> | <b>2.6064</b> | <b>none</b> | <b>none</b> | <b>none</b>            | <b>none</b> |
| 4      | Enprofylline                              | 5.7339        | high        | none        | none                   | none        |
| 5      | Theophylline                              | 2.5134        | high        | high        | high                   | none        |
| 6      | Arecoline                                 | 3.0974        | high        | high        | none                   | none        |
| 7      | Berberine                                 | -2.2467       | none        | none        | none                   | none        |
| 8      | Caffeine                                  | 2.5858        | high        | high        | high                   | none        |
| 9      | Nonivamide                                | -19.466       | none        | none        | none                   | none        |
| 10     | <b>Dyphylline</b>                         | <b>4.4457</b> | <b>none</b> | <b>none</b> | <b>none</b>            | <b>none</b> |
| 11     | <b>Furafylline</b>                        | <b>4.374</b>  | <b>none</b> | <b>none</b> | <b>none</b>            | <b>none</b> |
| 12     | Harmaline                                 | 2.0945        | none        | none        | high                   | none        |
| 13     | 3-isobutyl-1-methyl-7H-xanthine           | -1.4031       | high        | none        | none                   | none        |
| 14     | Papaverine                                | -1.7454       | none        | none        | none                   | none        |
| 15     | Pentoxifylline                            | -1.5832       | high        | none        | high                   | high        |
| 16     | Propentofylline                           | -1.6163       | none        | none        | none                   | high        |
| 17     | Proxiphylline                             | 2.7251        | low         | high        | none                   | none        |
| 18     | Tetrahydropalmatine                       | 2.9203        | none        | none        | low                    | none        |
| 19     | Theobromine                               | 3.421         | high        | high        | high                   | none        |
| 20     | Lysergic acid diethylamide                | 7.8391        | none        | none        | high                   | none        |

|    |                             |                |             |             |             |             |
|----|-----------------------------|----------------|-------------|-------------|-------------|-------------|
| 21 | <b>Pilocarpine</b>          | <b>4.1824</b>  | <b>none</b> | <b>none</b> | <b>none</b> | <b>none</b> |
| 22 | <b>Physostigmine</b>        | <b>1.9297</b>  | <b>none</b> | <b>none</b> | <b>none</b> | <b>none</b> |
| 23 | <b>Apomorphine</b>          | <b>4.7822</b>  | <b>none</b> | <b>none</b> | <b>none</b> | <b>none</b> |
| 24 | Colchicine                  | 1.024          | none        | none        | high        | none        |
| 25 | Methylergometrine           | 8.0208         | none        | none        | high        | high        |
| 26 | <b>Pseudotropine</b>        | <b>1.8332</b>  | <b>none</b> | <b>none</b> | <b>none</b> | <b>none</b> |
| 27 | <b>Yohimbine</b>            | <b>1.5035</b>  | <b>none</b> | <b>none</b> | <b>none</b> | <b>none</b> |
| 28 | Aminophylline               | 2.5134         | high        | high        | high        | none        |
| 29 | <b>Galantamine</b>          | <b>5.3857</b>  | <b>none</b> | <b>none</b> | <b>none</b> | <b>none</b> |
| 30 | Methysergide                | 8.0208         | high        | none        | high        | high        |
| 31 | Xanthinol                   | <b>6.0082</b>  | <b>none</b> | <b>none</b> | <b>none</b> | <b>none</b> |
| 32 | Emetine                     | 3.8313         | none        | high        | none        | high        |
| 33 | Psilocybin                  | -14.96         | high        | none        | none        | none        |
| 34 | Dimenhydrinate              | 4.6945         | high        | none        | high        | none        |
| 35 | <b>8-chlorotheophylline</b> | <b>2.5231</b>  | <b>none</b> | <b>none</b> | <b>none</b> | <b>none</b> |
| 36 | <b>Bromotheophylline</b>    | <b>0.68159</b> | <b>none</b> | <b>none</b> | <b>none</b> | <b>none</b> |
| 37 | Phenazocine                 | 3.329          | none        | none        | high        | none        |
| 38 | <b>Vincamine</b>            | <b>1.8025</b>  | <b>none</b> | <b>none</b> | <b>none</b> | <b>none</b> |
| 39 | <b>Bamifylline</b>          | <b>5.8382</b>  | <b>none</b> | <b>none</b> | <b>none</b> | <b>none</b> |
| 40 | Fenethylline                | 7.1692         | none        | none        | high        | none        |
| 41 | Dehydroemetine              | 3.8992         | none        | high        | none        | high        |
| 42 | Bufoylline                  | 2.5134         | high        | high        | high        | none        |
| 43 | <b>Camptothecin</b>         | <b>5.3292</b>  | <b>none</b> | <b>none</b> | <b>none</b> | <b>none</b> |
| 44 | Reproterol                  | 5.7176         | none        | none        | high        | none        |
| 45 | Etamiphylline               | 6.8977         | none        | none        | none        | high        |

|    |                               |               |             |             |             |             |
|----|-------------------------------|---------------|-------------|-------------|-------------|-------------|
| 46 | Metergoline                   | -7.3817       | none        | none        | high        | none        |
| 47 | Lisuride                      | 7.3646        | none        | none        | high        | none        |
| 48 | <b>Duvoglustat</b>            | <b>3.055</b>  | <b>none</b> | <b>none</b> | <b>none</b> | <b>none</b> |
| 49 | Nicergoline                   | 2.5093        | none        | none        | high        | none        |
| 50 | <b>Staurosporine</b>          | <b>4.7259</b> | <b>none</b> | <b>none</b> | <b>none</b> | <b>none</b> |
| 51 | Pergolide                     | 4.1164        | none        | none        | high        | none        |
| 52 | Doxofylline                   | -2.5282       | none        | none        | none        | none        |
| 53 | <b>Miglustat</b>              | <b>2.5386</b> | <b>none</b> | <b>none</b> | <b>none</b> | <b>none</b> |
| 54 | Cabergoline                   | 6.1842        | none        | none        | high        | none        |
| 55 | <b>Topotecan</b>              | <b>6.6593</b> | <b>none</b> | <b>none</b> | <b>none</b> | <b>none</b> |
| 56 | Tenidap                       | 5.0482        | none        | high        | none        | high        |
| 57 | <b>Rolofylline</b>            | <b>5.4469</b> | <b>none</b> | <b>none</b> | <b>none</b> | <b>none</b> |
| 58 | <b>Tretoquinol</b>            | <b>1.2531</b> | <b>none</b> | <b>none</b> | <b>none</b> | <b>none</b> |
| 59 | Metoserpate                   | 2.1823        | none        | none        | high        | none        |
| 60 | Acefylline                    | -2.1888       | none        | none        | none        | none        |
| 61 | Pentifylline                  | -5.5075       | none        | none        | none        | none        |
| 62 | Moxaverine                    | -2.0047       | none        | none        | none        | none        |
| 63 | <b>Methscopolamine</b>        | <b>1.9941</b> | <b>none</b> | <b>none</b> | <b>none</b> | <b>none</b> |
| 64 | <b>Vinburnine</b>             | <b>3.4076</b> | <b>none</b> | <b>none</b> | <b>none</b> | <b>none</b> |
| 65 | Cafedrine                     | 6.7504        | none        | none        | low         | none        |
| 66 | <b>Theodrenaline</b>          | <b>5.6468</b> | <b>none</b> | <b>none</b> | <b>none</b> | <b>none</b> |
| 67 | <b>7-Hydroxystaurosporine</b> | <b>5.0622</b> | <b>none</b> | <b>none</b> | <b>none</b> | <b>none</b> |
| 68 | 9-aminocamptothecin           | 5.3457        | high        | low         | none        | none        |
| 69 | <b>Tropinone</b>              | <b>1.4196</b> | <b>none</b> | <b>none</b> | <b>none</b> | <b>none</b> |
| 70 | <b>Nicotine</b>               | <b>4.4595</b> | <b>none</b> | <b>none</b> | <b>none</b> | <b>none</b> |

|    |                                            |                |             |             |             |             |
|----|--------------------------------------------|----------------|-------------|-------------|-------------|-------------|
| 71 | <b>Ecgonine</b>                            | <b>1.8158</b>  | <b>none</b> | <b>none</b> | <b>none</b> | <b>none</b> |
| 72 | Hydroquinidine                             | 1.038          | none        | none        | none        | high        |
| 73 | 10-hydroxycamptothecin                     | <b>5.3292</b>  | <b>none</b> | <b>none</b> | <b>none</b> | <b>none</b> |
| 74 | Lobeline                                   | -0.2215        | none        | none        | none        | none        |
| 75 | <b>7-ethyl-10-hydroxycamptothecin</b>      | <b>5.3292</b>  | <b>none</b> | <b>none</b> | <b>none</b> | <b>none</b> |
| 76 | Dihydroetorphine                           | 3.265          | none        | none        | none        | high        |
| 77 | Hydroquinine                               | 1.038          | none        | none        | none        | high        |
| 78 | Cositecan                                  | -68.377        | none        | none        | none        | high        |
| 79 | <b>Exatecan</b>                            | <b>3.0211</b>  | <b>none</b> | <b>none</b> | <b>none</b> | <b>none</b> |
| 80 | <b>5-Methoxy-N,N-diisopropyltryptamine</b> | <b>3.0812</b>  | <b>none</b> | <b>none</b> | <b>none</b> | <b>none</b> |
| 81 | <b>Hyoscyamine</b>                         | <b>3.0135</b>  | <b>none</b> | <b>none</b> | <b>none</b> | <b>none</b> |
| 82 | Butylscopolamine                           | -0.38167       | none        | none        | none        | none        |
| 83 | <b>Atropine</b>                            | <b>3.0135</b>  | <b>none</b> | <b>none</b> | <b>none</b> | <b>none</b> |
| 84 | <b>Migalastat</b>                          | <b>3.055</b>   | <b>none</b> | <b>none</b> | <b>none</b> | <b>none</b> |
| 85 | Ambroxolacefyllinate                       | -1.2867        | none        | none        | none        | none        |
| 86 | Phenserine                                 | -3.6765        | none        | none        | none        | none        |
| 87 | <b>Deptropine</b>                          | <b>2.1325</b>  | <b>none</b> | <b>none</b> | <b>none</b> | <b>none</b> |
| 88 | <b>Tonapofylline</b>                       | <b>4.1019</b>  | <b>none</b> | <b>none</b> | <b>none</b> | <b>none</b> |
| 89 | <b>Diflomotecan</b>                        | <b>2.7696</b>  | <b>none</b> | <b>none</b> | <b>none</b> | <b>none</b> |
| 90 | Demecolcine                                | 1.837          | none        | none        | high        | none        |
| 91 | Colchicine                                 | 1.1911         | high        | none        | high        | none        |
| 92 | Methylecgonine                             | -0.18672       | none        | none        | none        | none        |
| 93 | <b>Noscapine</b>                           | <b>4.3358</b>  | <b>none</b> | <b>none</b> | <b>none</b> | <b>none</b> |
| 94 | <b>Strychnine</b>                          | <b>4.5843</b>  | <b>none</b> | <b>none</b> | <b>none</b> | <b>none</b> |
| 95 | <b>Quinidine</b>                           | <b>0.87864</b> | <b>none</b> | <b>none</b> | <b>none</b> | <b>none</b> |

|     |                                  |                |             |             |             |             |
|-----|----------------------------------|----------------|-------------|-------------|-------------|-------------|
| 96  | Pentazocine                      | 3.3217         | none        | none        | high        | none        |
| 97  | <b>Miglitol</b>                  | <b>4.2706</b>  | <b>none</b> | <b>none</b> | <b>none</b> | <b>none</b> |
| 98  | <b>Rauwolfiaserpentina root</b>  | <b>2.6043</b>  | <b>none</b> | <b>none</b> | <b>none</b> | <b>none</b> |
| 99  | <b>Diprenorphine</b>             | <b>2.5267</b>  | <b>none</b> | <b>none</b> | <b>none</b> | <b>none</b> |
| 100 | Ergometrine                      | 6.2554         | none        | none        | high        | none        |
| 101 | Terguride                        | 7.3416         | none        | none        | high        | none        |
| 102 | Vinpocetine                      | -0.26904       | none        | none        | none        | none        |
| 103 | Cocaine                          | -0.52972       | none        | none        | high        | high        |
| 104 | <b>Benzoylcegonine</b>           | <b>1.4683</b>  | <b>none</b> | <b>none</b> | <b>none</b> | <b>none</b> |
| 105 | <b>Rubitecan</b>                 | <b>0.38166</b> | <b>none</b> | <b>none</b> | <b>none</b> | <b>none</b> |
| 106 | Lisofylline                      | -3.3518        | none        | none        | none        | none        |
| 107 | <b>Lucerastat</b>                | <b>2.5386</b>  | <b>none</b> | <b>none</b> | <b>none</b> | <b>none</b> |
| 108 | <b>Sparteine</b>                 | <b>1.4482</b>  | <b>none</b> | <b>none</b> | <b>none</b> | <b>none</b> |
| 109 | <b>Buprenorphine</b>             | <b>2.5141</b>  | <b>none</b> | <b>none</b> | <b>none</b> | <b>none</b> |
| 110 | Etorphine                        | 4.4752         | none        | none        | none        | high        |
| 111 | Butropium                        | -3.2621        | none        | none        | none        | high        |
| 112 | Methylatropine                   | 3.4926         | none        | none        | none        | none        |
| 113 | <b>Oxtriphylline</b>             | <b>1.7125</b>  | <b>none</b> | <b>none</b> | <b>none</b> | <b>none</b> |
| 114 | <b>Anisotropinemethylbromide</b> | <b>1.7176</b>  | <b>none</b> | <b>none</b> | <b>none</b> | <b>none</b> |
| 115 | <b>Ipratropium</b>               | <b>1.8233</b>  | <b>none</b> | <b>none</b> | <b>none</b> | <b>none</b> |
| 116 | <b>Benzatropine</b>              | <b>2.1325</b>  | <b>none</b> | <b>none</b> | <b>none</b> | <b>none</b> |
| 117 | Zucapsaicin                      | -10.379        | none        | none        | none        | none        |
| 118 | Capsaicin                        | -10.379        | none        | none        | none        | none        |
| 119 | Drotaverine                      | -0.30443       | none        | none        | high        | none        |
| 120 | <b>Scopolamine</b>               | <b>2.875</b>   | <b>none</b> | <b>none</b> | <b>none</b> | <b>none</b> |

|     |                        |                |             |             |             |             |
|-----|------------------------|----------------|-------------|-------------|-------------|-------------|
| 121 | <b>Quinine</b>         | <b>0.87864</b> | <b>none</b> | <b>none</b> | <b>none</b> | <b>none</b> |
| 122 | <b>K-252a</b>          | <b>1.9148</b>  | <b>none</b> | <b>none</b> | <b>none</b> | <b>none</b> |
| 123 | Dimemorfan             | -0.22762       | none        | none        | none        | none        |
| 124 | Ioflupane I-123        | -1.1542        | none        | none        | none        | none        |
| 125 | Harmine                | -0.92948       | low         | none        | none        | none        |
| 126 | Homatropine            | 1.1497         | none        | none        | none        | high        |
| 127 | <b>Codeine</b>         | <b>5.1305</b>  | <b>none</b> | <b>none</b> | <b>none</b> | <b>none</b> |
| 128 | <b>Dihydrocodeine</b>  | <b>4.2758</b>  | <b>none</b> | <b>none</b> | <b>none</b> | <b>none</b> |
| 129 | <b>Hydrocodone</b>     | <b>4.2643</b>  | <b>none</b> | <b>none</b> | <b>none</b> | <b>none</b> |
| 130 | <b>Hydromorphone</b>   | <b>4.2337</b>  | <b>none</b> | <b>none</b> | <b>none</b> | <b>none</b> |
| 131 | <b>Nalmefene</b>       | <b>1.35</b>    | <b>none</b> | <b>none</b> | <b>none</b> | <b>none</b> |
| 132 | <b>Nalorphine</b>      | <b>0.91284</b> | <b>none</b> | <b>none</b> | <b>none</b> | <b>none</b> |
| 133 | <b>Naloxone</b>        | <b>0.78037</b> | <b>none</b> | <b>none</b> | <b>none</b> | <b>none</b> |
| 134 | <b>Oxycodone</b>       | <b>4.9034</b>  | <b>none</b> | <b>none</b> | <b>none</b> | <b>none</b> |
| 135 | <b>Oxymorphone</b>     | <b>4.8562</b>  | <b>none</b> | <b>none</b> | <b>none</b> | <b>none</b> |
| 136 | Trospium               | -0.46271       | none        | none        | none        | none        |
| 137 | <b>Morphine</b>        | <b>5.0881</b>  | <b>none</b> | <b>none</b> | <b>none</b> | <b>none</b> |
| 138 | Rivanicline            | -0.28957       | none        | high        | none        | none        |
| 139 | <b>Nalbuphine</b>      | <b>3.6567</b>  | <b>none</b> | <b>none</b> | <b>none</b> | <b>none</b> |
| 140 | <b>Bicuculine</b>      | <b>0.12</b>    | <b>None</b> | <b>None</b> | <b>None</b> | <b>None</b> |
| 141 | <b>Pholcodine</b>      | <b>5.8282</b>  | <b>none</b> | <b>none</b> | <b>none</b> | <b>none</b> |
| 142 | <b>Ethylmorphine</b>   | <b>3.6915</b>  | <b>none</b> | <b>none</b> | <b>none</b> | <b>none</b> |
| 143 | Levorphanol            | -0.25467       | none        | none        | low         | none        |
| 144 | Levallorphan           | -4.6071        | none        | none        | none        | none        |
| 145 | <b>Dihydromorphone</b> | <b>4.2386</b>  | <b>none</b> | <b>none</b> | <b>none</b> | <b>none</b> |



|     |                             |               |             |             |             |             |
|-----|-----------------------------|---------------|-------------|-------------|-------------|-------------|
| 146 | <b>Naltrexone</b>           | <b>4.6068</b> | <b>none</b> | <b>none</b> | <b>none</b> | <b>none</b> |
| 147 | <b>Morphine glucuronide</b> | <b>3.962</b>  | <b>none</b> | <b>none</b> | <b>none</b> | <b>none</b> |
| 148 | Dextromethorphan            | -0.33388      | none        | none        | none        | none        |
| 149 | Dextrophan                  | -0.25467      | none        | none        | low         | none        |
| 150 | Butorphanol                 | -0.62733      | none        | none        | none        | none        |
| 151 | Methylnaltrexone            | 0.63257       | none        | none        | none        | none        |
| 152 | <b>Desomorphine</b>         | <b>2.0446</b> | <b>none</b> | <b>none</b> | <b>none</b> | <b>none</b> |
| 153 | <b>Nicomorphine</b>         | <b>4.7938</b> | <b>none</b> | <b>none</b> | <b>none</b> | <b>none</b> |
| 154 | <b>Diamorphine</b>          | <b>4.8851</b> | <b>none</b> | <b>none</b> | <b>none</b> | <b>none</b> |
| 155 | <b>Drotebanol</b>           | <b>4.6517</b> | <b>none</b> | <b>none</b> | <b>none</b> | <b>none</b> |
| 156 | <b>Tiotropium</b>           | <b>4.8619</b> | <b>none</b> | <b>none</b> | <b>none</b> | <b>none</b> |
| 157 | <b>Ajmaline</b>             | <b>3.4513</b> | <b>none</b> | <b>none</b> | <b>none</b> | <b>none</b> |
| 158 | Altropane                   | -1.3287       | none        | none        | none        | none        |
| 159 | <b>Nalfurafine</b>          | <b>4.4373</b> | <b>none</b> | <b>none</b> | <b>none</b> | <b>none</b> |
| 160 | <b>Belotecan</b>            | <b>7.6567</b> | <b>none</b> | <b>none</b> | <b>none</b> | <b>none</b> |
| 161 | AR-67                       | -52.664       | none        | none        | none        | high        |
| 162 | Oxitropium                  | <b>1.9563</b> | <b>none</b> | <b>none</b> | <b>none</b> | <b>none</b> |
| 163 | Anisodamine                 | 3.4327        | none        | none        | none        | none        |
| 164 | Gimatecan                   | -2.2795       | none        | none        | none        | none        |
| 165 | <b>Variolin B</b>           | <b>3.1147</b> | <b>none</b> | <b>none</b> | <b>none</b> | <b>none</b> |
| 166 | <b>Naxifylline</b>          | <b>5.639</b>  | <b>none</b> | <b>none</b> | <b>none</b> | <b>none</b> |
| 167 | Dihydrocapsiate             | -15.31        | none        | none        | none        | none        |
| 168 | <b>Fentonium</b>            | <b>1.9364</b> | <b>none</b> | <b>none</b> | <b>none</b> | <b>none</b> |
| 169 | Homatropinemethylbromide    | 1.3761        | none        | none        | none        | high        |
| 170 | Namitecan                   | 5.1799        | none        | none        | none        | none        |

|     |                                        |                |             |             |             |             |
|-----|----------------------------------------|----------------|-------------|-------------|-------------|-------------|
| 171 | Posiphen                               | -3.6765        | none        | none        | none        | none        |
| 172 | <b>Aclidinium</b>                      | <b>3.1287</b>  | <b>none</b> | <b>none</b> | <b>none</b> | <b>none</b> |
| 173 | Samidorphan                            | 4.4951         | none        | none        | none        | none        |
| 174 | <b>18-methoxycoronaridine</b>          | <b>1.6643</b>  | <b>none</b> | <b>none</b> | <b>none</b> | <b>none</b> |
| 175 | <b>Cimetropium</b>                     | <b>2.22</b>    | <b>none</b> | <b>none</b> | <b>none</b> | <b>none</b> |
| 176 | <b>Cyprenorphine</b>                   | <b>3.7547</b>  | <b>none</b> | <b>none</b> | <b>none</b> | <b>none</b> |
| 177 | <b>Etybenzatropine</b>                 | <b>1.0379</b>  | <b>none</b> | <b>none</b> | <b>none</b> | <b>none</b> |
| 178 | <b>PCS-499</b>                         | <b>3.9575</b>  | <b>none</b> | <b>none</b> | <b>none</b> | <b>none</b> |
| 179 | <b>Axelopran</b>                       | <b>0.25891</b> | <b>none</b> | <b>none</b> | <b>none</b> | <b>none</b> |
| 180 | <b>NS-2359</b>                         | <b>0.98602</b> | <b>none</b> | <b>none</b> | <b>none</b> | <b>none</b> |
| 181 | Nazartinib                             | 2.8132         | none        | high        | high        | none        |
| 182 | Lorajmine                              | 2.1446         | high        | high        | high        | high        |
| 183 | <b>Prajmaline</b>                      | <b>2.3465</b>  | <b>none</b> | <b>none</b> | <b>none</b> | <b>none</b> |
| 184 | <b>8-azaxanthine</b>                   | <b>4.4521</b>  | <b>none</b> | <b>none</b> | <b>none</b> | <b>none</b> |
| 185 | N-n-octanoylnornicotine                | -16.26         | none        | none        | none        | none        |
| 186 | N-(4-hydroxyundecanoyl)anabasine       | -13.509        | none        | none        | none        | none        |
| 187 | Capsaicin                              | -10.379        | none        | none        | none        | none        |
| 188 | Harmalol                               | -8.933         | high        | none        | none        | none        |
| 189 | Saprosmine A                           | -8.7616        | none        | none        | none        | none        |
| 190 | Saprosmine B                           | -6.8486        | none        | none        | none        | none        |
| 191 | 13(R)-antofine-N-oxide                 | -4.8761        | low         | high        | none        | none        |
| 192 | tylophoridicine F                      | -3.97          | low         | high        | none        | none        |
| 193 | tylophoridicine C                      | -3.97          | low         | high        | none        | none        |
| 194 | 13(R)-14(R)-hydroxyantofine-N-oxide    | -3.97          | low         | high        | none        | none        |
| 195 | canthin-6-one 9-O-beta-glucopyranoside | -3.2891        | low         | none        | none        | none        |

|     |                                               |                 |             |             |             |             |
|-----|-----------------------------------------------|-----------------|-------------|-------------|-------------|-------------|
| 196 | Cephalotaxine beta-N-oxide                    | -3.2562         | none        | none        | none        | none        |
| 197 | Cephalotaxine alpha-N-oxide                   | -3.2562         | none        | none        | none        | none        |
| 198 | 4-methoxycarbonyl-5,10-benzogquinolinequinone | -3.0999         | high        | none        | none        | none        |
| 199 | Sanguinarine                                  | -2.4707         | none        | none        | none        | none        |
| 200 | Berberine                                     | -2.2467         | none        | none        | none        | none        |
| 201 | Chelerythrine                                 | -2.1842         | none        | none        | none        | none        |
| 202 | beta-carboline-1-propionic acid               | -1.9151         | low         | none        | none        | none        |
| 203 | Papaverine                                    | -1.7454         | none        | none        | none        | none        |
| 204 | 7-methoxy-beta-carboline-1-propionic acid     | -1.706          | low         | none        | none        | none        |
| 205 | 9-methoxycanthin-6-one 3N-oxide<NL>           | -0.99092        | none        | none        | none        | none        |
| 206 | Harmame                                       | -0.96557        | high        | none        | none        | none        |
| 207 | Ellipticine                                   | -0.96557        | high        | none        | none        | none        |
| 208 | Harmine                                       | -0.92948        | low         | none        | none        | none        |
| 209 | liriodenine                                   | -0.92304        | none        | none        | none        | none        |
| 210 | Cis-Zeatin                                    | -0.51868        | high        | high        | low         | high        |
| 211 | Rohitukine                                    | -0.1543         | none        | none        | none        | none        |
| 212 | Holamine                                      | -0.066098       | none        | none        | high        | none        |
| 213 | <b>Marcanines A</b>                           | <b>0.016126</b> | <b>none</b> | <b>none</b> | <b>none</b> | <b>none</b> |
| 214 | <b>Matrine</b>                                | <b>0.2541</b>   | <b>none</b> | <b>none</b> | <b>none</b> | <b>none</b> |
| 215 | Brucine N-oxide                               | 0.26167         | none        | low         | none        | none        |
| 216 | canthin-6-one                                 | 0.35032         | low         | none        | none        | none        |
| 217 | (R)-cryptopleurine                            | 0.52242         | low         | high        | none        | none        |
| 218 | <b>(-)-anonnaine</b>                          | <b>0.61</b>     | <b>none</b> | <b>none</b> | <b>none</b> | <b>none</b> |
| 219 | 15-alpha-Hydroxyholamine                      | 0.635           | none        | none        | high        | none        |

|     |                                             |               |             |             |             |             |
|-----|---------------------------------------------|---------------|-------------|-------------|-------------|-------------|
| 220 | 3-alpha-Amino-14-beta-hydroxypregnan-20-one | 0.82077       | none        | none        | high        | none        |
| 221 | 9-methoxycanthin-6-one                      | 1.24          | high        | none        | none        | none        |
| 222 | Lycoricidinol                               | 1.313         | none        | none        | high        | none        |
| 223 | 17-epi-N-Demethylholacurtine                | 1.5367        | none        | none        | high        | none        |
| 224 | N-Demethylholacurtine                       | 1.5367        | none        | none        | high        | none        |
| 225 | <b>Vincamine</b>                            | <b>1.8025</b> | <b>none</b> | <b>none</b> | <b>none</b> | <b>none</b> |
| 226 | <b>Physostigmine</b>                        | <b>1.9297</b> | <b>none</b> | <b>none</b> | <b>none</b> | <b>none</b> |
| 227 | <b>9-hydroxycanthin-6-one</b>               | <b>2.1077</b> | <b>none</b> | <b>none</b> | <b>none</b> | <b>none</b> |
| 228 | Holacurtinol                                | 2.1445        | none        | none        | high        | none        |
| 229 | Neocryptolepine                             | 2.3562        | none        | none        | high        | none        |
| 230 | <b>Harmol</b>                               | <b>2.6265</b> | <b>none</b> | <b>none</b> | <b>none</b> | <b>none</b> |
| 231 | <b>Cryptolepine</b>                         | <b>2.9343</b> | <b>none</b> | <b>none</b> | <b>none</b> | <b>none</b> |
| 232 | <b>Corydaline</b>                           | <b>3.1151</b> | <b>none</b> | <b>none</b> | <b>none</b> | <b>none</b> |
| 233 | 7-desmethyltylophorine                      | 3.1309        | low         | high        | none        | none        |
| 234 | 6-O-desmethylanofine                        | 3.1309        | low         | high        | none        | none        |
| 235 | Isocephalotaxine                            | 3.1454        | none        | none        | high        | none        |
| 236 | Tylocrebrine                                | 3.1505        | low         | high        | none        | none        |
| 237 | Isotylocrebrine                             | 3.1505        | low         | high        | none        | none        |
| 238 | Antofine                                    | 3.1505        | low         | high        | none        | none        |
| 239 | (S)-tylophorine                             | 3.1505        | low         | high        | none        | none        |
| 240 | (S)-isotylocrebrine                         | 3.1505        | low         | high        | none        | none        |
| 241 | (R)-tylophorine                             | 3.1505        | low         | high        | none        | none        |
| 242 | (R)-antofine                                | 3.1505        | low         | high        | none        | none        |
| 243 | 11-beta-hydroxycephalotaxine beta-N-oxide   | 3.1505        | low         | high        | none        | none        |
| 244 | <b>Lycorine</b>                             | <b>3.1877</b> | <b>none</b> | <b>none</b> | <b>none</b> | <b>none</b> |

|     |                           |               |             |             |             |             |
|-----|---------------------------|---------------|-------------|-------------|-------------|-------------|
| 245 | <b>Rhyncophylline</b>     | <b>3.3474</b> | <b>none</b> | <b>none</b> | <b>none</b> | <b>none</b> |
| 246 | (S)-tyloindicine I        | 3.3476        | none        | none        | high        | none        |
| 247 | (+)-tylophorinidine       | 3.5386        | low         | high        | none        | none        |
| 248 | 6-O-desmethylsecoantofine | 3.6885        | none        | none        | high        | none        |
| 249 | Secoantofine              | 3.7051        | none        | none        | high        | none        |
| 250 | Psychotrine               | 3.9783        | none        | high        | none        | high        |
| 251 | Tubulosine                | 4.1737        | none        | high        | none        | high        |
| 252 | tyloindicine G            | 4.3085        | none        | none        | high        | high        |
| 253 | tyloindicine F            | 4.3085        | none        | none        | high        | none        |
| 254 | <b>Hydrastine</b>         | <b>4.3358</b> | <b>none</b> | <b>none</b> | <b>none</b> | <b>none</b> |
| 255 | Holacurtine               | 4.3905        | none        | none        | high        | none        |
| 256 | 17-epi-Holacurtine        | 4.3905        | none        | none        | high        | none        |
| 257 | <b>Isostrychnine</b>      | <b>4.5247</b> | <b>none</b> | <b>none</b> | <b>none</b> | <b>none</b> |
| 258 | <b>Strychnine</b>         | <b>4.5843</b> | <b>none</b> | <b>none</b> | <b>none</b> | <b>none</b> |
| 259 | Brucine                   | 4.6438        | none        | low         | none        | none        |
| 260 | Reserpine acid            | 4.7169        | none        | none        | high        | none        |
| 261 | <b>Evodiamine</b>         | <b>5.1076</b> | <b>none</b> | <b>none</b> | <b>none</b> | <b>none</b> |
| 262 | <b>Camptothecin</b>       | <b>5.3292</b> | <b>none</b> | <b>none</b> | <b>none</b> | <b>none</b> |
| 263 | 9-Aminocamptothecin       | 5.3457        | high        | low         | none        | none        |
| 264 | <b>Reticuline</b>         | <b>5.29</b>   | <b>None</b> | <b>None</b> | <b>None</b> | <b>None</b> |

**Note: Bold entries were taken for further screening**

**Table S3:**Docking results of iGEMDOCK algorithm

| S. No. | Compounds                      | iGEMDOCK (kcal/mol) |
|--------|--------------------------------|---------------------|
| Ref    | Artemisinin                    | -91.3722            |
| 1      | Axelopran                      | -125.326            |
| 2      | Nicomorphine                   | -122.544            |
| 3      | Fentonium                      | -121.709            |
| 4      | Namitecan                      | -121.464            |
| 5      | Morphine glucuronide           | -119.945            |
| 6      | Rubitecan                      | -119.292            |
| 7      | Aclidinium                     | -116.089            |
| 8      | K-252a                         | -115.782            |
| 9      | 7-ethyl-10-hydroxycamptothecin | -115.559            |
| 10     | Tonapofylline                  | -113.324            |
| 11     | Oxitropium                     | -112.543            |
| 12     | Topotecan                      | -110.615            |
| 13     | Hydrastine                     | -110.116            |
| 14     | Tretoquinol                    | -110.106            |
| 15     | Theodrenaline                  | -109.685            |
| 16     | Bicuculline                    | -109.455            |
| 17     | Belotecan                      | -108.553            |
| 18     | 10-hydroxycamptothecin         | -108.289            |
| 19     | Bamifylline                    | -107.61             |
| 20     | Xanthinol                      | -107.509            |
| 21     | Nalfurafine                    | -106.569            |
| 22     | Naxifylline                    | -106.121            |
| 23     | Variolin B                     | -104.742            |
| 24     | Diflomotecan                   | -103.702            |
| 25     | Ipratropium                    | -103.666            |
| 26     | Lycorine                       | -102.344            |
| 27     | Methscopolamine                | -102.245            |
| 28     | Hyoscyamine                    | -101.993            |

|    |                                    |          |
|----|------------------------------------|----------|
| 29 | Camptothecin                       | -101.781 |
| 30 | Rhyncophylline                     | -101.492 |
| 31 | Noscapine                          | -101.414 |
| 32 | Tiotropium                         | -101.042 |
| 33 | 7-Hydroxystaurosporine             | -100.894 |
| 34 | Benzoylecgonine                    | -99.9005 |
| 35 | Furafylline                        | -99.4678 |
| 36 | Quinine                            | -99.0127 |
| 37 | 18-methoxycoronaridine             | -98.5351 |
| 38 | Dyphylline                         | -98.2116 |
| 39 | PCS-499                            | -97.0292 |
| 40 | Vincamine                          | -96.9741 |
| 41 | Buprenorphine                      | -96.7721 |
| 42 | Praijmaline                        | -96.477  |
| 43 | Evodiamine                         | -96.2743 |
| 44 | Staurosporine                      | -96.2402 |
| 45 | Atropine                           | -96.1418 |
| 46 | Rolofylline                        | -95.7426 |
| 47 | Reticuline                         | -95.6594 |
| 48 | Anisodamine                        | -95.0347 |
| 49 | Exatecan                           | -95.0082 |
| 50 | 8-cyclopentyl-1,3-dipropylxanthine | -94.2662 |
| 51 | Cimetropium                        | -94.0635 |
| 52 | Methylatropine                     | -94.0079 |
| 53 | Samidorphan                        | -93.6762 |
| 54 | Yohimbine                          | -93.6743 |
| 55 | Cyprenorphine                      | -93.4031 |
| 56 | Rauwolfia serpentina root          | -93.2392 |
| 57 | Methylnaltrexone                   | -93.142  |
| 58 | Etybenzatropine                    | -93.0622 |
| 59 | Deptropine                         | -92.8259 |
| 60 | Isostrychnine                      | -92.619  |

|    |                                     |          |
|----|-------------------------------------|----------|
| 61 | Lucerastat                          | -91.9422 |
| 62 | Diprenorphine                       | -91.803  |
| 63 | Ajmaline                            | -90.9876 |
| 64 | Vinburnine                          | -90.284  |
| 65 | Pholcodine                          | -90.2835 |
| 66 | Benzatropine                        | -90.1175 |
| 67 | Corydaline                          | -90.0204 |
| 68 | Nalbuphine                          | -89.9547 |
| 69 | 5-Methoxy-N,N-diisopropyltryptamine | -89.7153 |
| 70 | Scopolamine                         | -89.7064 |
| 71 | Quinidine                           | -89.5134 |
| 72 | Naltrexone                          | -88.9509 |
| 73 | Apomorphine                         | -88.6905 |
| 74 | Physostigmine                       | -88.5954 |
| 75 | (-)-anone                           | -87.93   |
| 76 | Ioflupane I-123                     | -87.9    |
| 77 | Strychnine                          | -87.4441 |
| 78 | Naloxone                            | -87.2566 |
| 79 | Anisotropin methyl bromide          | -87.1993 |
| 80 | Oxymorphone                         | -85.8151 |
| 81 | Cryptolepine                        | -85.7146 |
| 82 | Nalorphine                          | -85.5843 |
| 83 | Diamorphine                         | -85.4754 |
| 84 | Miglustat                           | -85.0007 |
| 85 | Miglitol                            | -84.7194 |
| 86 | Marcaines A                         | -84.5263 |
| 87 | 9-hydroxycanthin-6-one              | -83.946  |
| 88 | Nalmefene                           | -83.6774 |
| 89 | Oxtriphylline                       | -83.6001 |
| 90 | Hydromorphone                       | -83.5136 |
| 91 | Morphine                            | -83.4119 |
| 92 | Harmol                              | -81.6226 |



|     |                      |          |
|-----|----------------------|----------|
| 93  | Dihydromorphine      | -80.9058 |
| 94  | Pilocarpine          | -80.8781 |
| 95  | NS-2359              | -79.9321 |
| 96  | Galantamine          | -79.591  |
| 97  | Matrine              | -78.9337 |
| 98  | Hydrocodone          | -78.6178 |
| 99  | Migalastat           | -78.5602 |
| 100 | Codeine              | -77.95   |
| 101 | Oxycodone            | -76.3101 |
| 102 | Desomorphine         | -75.1219 |
| 103 | 8-azaxanthine        | -74.939  |
| 104 | Drotebanol           | -74.8465 |
| 105 | Duvoglustat          | -74.3026 |
| 106 | Bromotheophylline    | -73.0872 |
| 107 | 8-chlorotheophylline | -72.7254 |
| 108 | Ecgonine             | -72.404  |
| 109 | Xanthine             | -71.5821 |
| 110 | Ethylmorphine        | -71.4814 |
| 111 | Dihydrocodeine       | -71.3592 |
| 112 | Sparteine            | -68.1736 |
| 113 | Nicotine             | -65.4694 |
| 114 | Pseudotropine        | -57.0935 |
| 115 | Tropinone            | -51.787  |

**Note: Bold entries were taken for further analysis**

**Table S4:** Computational estimation of oral toxicity (LD50) and oral absorption availability (clogS)

| S. No. | Compounds                      | AMES toxicity | Oral Rat Acute Toxicity (LD50) mol/kg | Oral Rat Chronic Toxicity (LOAEL) (log mg/kg_bw/day) | Hepatotoxicity |
|--------|--------------------------------|---------------|---------------------------------------|------------------------------------------------------|----------------|
| Ref.   | Artemisinin                    | Yes           | 2.459                                 | 1                                                    | No             |
| 1      | Exatecan                       | No            | 3.06                                  | 1.323                                                | Yes            |
| 2      | 10-hydroxycamptothecin         | No            | 2.418                                 | 1.738                                                | Yes            |
| 3      | Fentonium                      | No            | 2.883                                 | 1.411                                                | Yes            |
| 4      | 7-ethyl-10-hydroxycamptothecin | No            | 2.444                                 | 1.551                                                | Yes            |
| 5      | Diflomotecan                   | No            | 2.551                                 | 1.324                                                | Yes            |
| 6      | Camptothecin                   | No            | 2.565                                 | 1.756                                                | Yes            |
| 7      | Morphine glucuronide           | No            | 2.312                                 | 3.346                                                | Yes            |
| 8      | Rubitecan                      | Yes           | 2.789                                 | 1.494                                                | Yes            |
| 9      | Nicomorphine                   | No            | 3.172                                 | 2.149                                                | Yes            |
| 10     | Rauwolfia serpentina root      | No            | 2.974                                 | 0.431                                                | Yes            |
| 11     | Belotecan                      | No            | 3.03                                  | 1.994                                                | Yes            |
| 12     | <b>Yohimbine</b>               | <b>No</b>     | <b>2.942</b>                          | <b>0.687</b>                                         | <b>No</b>      |
| 13     | Deptropine                     | No            | 2.711                                 | 0.414                                                | Yes            |
| 14     | Axelopran                      | No            | 2.278                                 | 2.09                                                 | Yes            |
| 15     | <b>Hydrastine</b>              | <b>No</b>     | <b>2.893</b>                          | <b>2.319</b>                                         | <b>No</b>      |
| 16     | Lycorine                       | Yes           | 2.545                                 | 0.912                                                | Yes            |
| 17     | Evodiamine                     | Yes           | 2.542                                 | 1.006                                                | Yes            |
| 18     | <b>Tretoquinol</b>             | <b>No</b>     | <b>2.886</b>                          | <b>1.843</b>                                         | <b>No</b>      |

|    |                                    |           |              |              |           |
|----|------------------------------------|-----------|--------------|--------------|-----------|
| 19 | Nalfurafine                        | No        | 3.285        | 0.278        | Yes       |
| 20 | <b>Vincamine</b>                   | <b>No</b> | <b>3</b>     | <b>0.613</b> | <b>No</b> |
| 21 | <b>Aclidinium</b>                  | <b>No</b> | <b>2.301</b> | <b>1.028</b> | <b>No</b> |
| 22 | <b>Reticuline</b>                  | <b>No</b> | <b>2.296</b> | <b>1.542</b> | <b>No</b> |
| 23 | <b>Isostrychnine</b>               | <b>No</b> | <b>3.087</b> | <b>2.097</b> | <b>No</b> |
| 24 | Diprenorphine                      | No        | 2.858        | 0.575        | Yes       |
| 25 | Naxifylline                        | Yes       | 2.618        | 0.239        | Yes       |
| 26 | Variolin B                         | No        | 2.355        | 2.099        | Yes       |
| 27 | <b>Noscapine</b>                   | <b>No</b> | <b>2.91</b>  | <b>2.313</b> | <b>No</b> |
| 28 | <b>Rolofylline</b>                 | <b>No</b> | <b>2.751</b> | <b>0.411</b> | <b>No</b> |
| 29 | Cyprenorphine                      | No        | 2.847        | 0.609        | Yes       |
| 30 | Tonapofylline                      | No        | 2.638        | 1.103        | Yes       |
| 31 | Theodrenaline                      | Yes       | 2.184        | 2.271        | No        |
| 32 | Quinine                            | Yes       | 2.728        | 0.635        | Yes       |
| 33 | Namitecan                          | Yes       | 2.727        | 2.078        | Yes       |
| 34 | <b>Benzoylecgonine</b>             | <b>No</b> | <b>1.787</b> | <b>2.051</b> | <b>No</b> |
| 35 | 18-methoxycoronaridine             | Yes       | 3.464        | 0.793        | Yes       |
| 36 | 8-cyclopentyl-1,3-dipropylxanthine | Yes       | 2.835        | 0.457        | Yes       |
| 37 | <b>Methylatropine</b>              | <b>No</b> | <b>2.624</b> | <b>2.624</b> | <b>No</b> |
| 38 | Samidorphan                        | No        | 2.143        | 2.317        | Yes       |

**Note: Bold entries were taken for analysis**

**Table S5:**3D pharmacophore analysis using PharmaGist

| S. No.   | Compounds         | Best Pairwise Alignment Scores |
|----------|-------------------|--------------------------------|
| <b>1</b> | <b>Noscapine</b>  | <b>6.64027</b>                 |
| <b>2</b> | <b>Reticuline</b> | <b>6.6333</b>                  |
| <b>3</b> | <b>Acridinium</b> | <b>6.3347</b>                  |
| 4        | Benzoylcegonine   | 6.32994                        |
| 5        | Vincamine         | 6.329                          |
| 6        | Tretoquinol       | 6.32673                        |
| 7        | Yohimbine         | 5.433                          |
| 8        | Hydrastine        | 5.13019                        |
| 9        | Rolofylline       | 4.818                          |
| 10       | Methylatropine    | 4.52976                        |
| 11       | Isostrychnine     | 3.926                          |

**Note: Bold entries (top 3) were taken for MSD analysis**

**Table S6:** Binding Free Energy calculations using MMPBSA

| Complex                            | Van der Waal energy (kJ/mol) | Electrostatic energy (kJ/mol) | Polar solvation energy (kJ/mol) | Binding energy (kJ/mol) |
|------------------------------------|------------------------------|-------------------------------|---------------------------------|-------------------------|
| <b>FP2-Artemisinin (Reference)</b> | -82.58 +/- 9.13              | -7.53 +/- 8.79                | 33.10 +/- 11.41                 | -64.76 +/- 10.39        |
| <b>FP2-Acridinium</b>              | -276.00 +/- 11.02            | -25.11 +/- 6.27               | 122.14 +/- 9.33                 | -204.23 +/- 12.37       |
| <b>FP2-Noscapine</b>               | -145.10 +/- 14.16            | -30.27 +/-12.09               | 85.36 +/-18.48                  | -104.44 +/- 13.80       |
| <b>FP2-Reticuline</b>              | -207.69 +/- 9.30             | 0.04 +/- 2.224                | 42.910 +/- 8.22                 | -183.37 +/- 10.88       |

**Table S7:** Detail of the top compounds with interacting residues, types of bond and bond distance

| Compound                   | Interacting residues | Types of bond with distance                                                                   |
|----------------------------|----------------------|-----------------------------------------------------------------------------------------------|
| Artemisinin<br>(Reference) | ALA 157              | 3.78, 4.99 (pi-alkyl)                                                                         |
|                            | TRP 206              | 4.22 (pi-alkyl), 4.13 (pi-alkyl), 4.88 (pi-alkyl and alkyl), 5.09 (pi-alkyl), 2.39 (pi-sigma) |
|                            | TRP 210              | 4.67, 5.41 (pi-alkyl)                                                                         |
| Noscapine                  | TRP 206              | 2.99 (carbon hydrogen), 4.02 (pi-pi stacked), 4.13 (pi-pi stacked)                            |
|                            | ALA 157              | 5.15 (pi-alkyl)                                                                               |
|                            | SER 153              | 2.67 (carbon-hydrogen)                                                                        |
| Reticuline                 | ALA 157              | 3.93, 4.96 (pi-alkyl),                                                                        |
|                            | TRP 206              | 3.64 (pi-pi stacked)                                                                          |
|                            | ASP 154              | 3.74 (carbon-hydrogen)                                                                        |
|                            | VAL 152              | 5.46 (alkyl), 3.37 (carbon hydrogen)                                                          |
|                            | ASN 173              | 2.45 (hydrogen bond)                                                                          |
| Aclidinium                 | GLN 36               | 2.32 (hydrogen bond)                                                                          |
|                            | ASN 173              | 2.38, 2.54 (carbon hydrogen)                                                                  |
|                            | HIS 174              | 2.53 (carbon hydrogen)                                                                        |
|                            | GLY 40               | 2.27 (carbon hydrogen)                                                                        |
|                            | ALA 175              | 4.78 (pi-alkyl)                                                                               |
|                            | LEU 84               | 4.76 (pi-alkyl)                                                                               |
